# Supplementary material
Source: MDPI journal article supplement (https://www.mdpi.com/2071-1050/13/14/7516)
Supplement: s1 [file s1]

Supplemental Material for Wang, Q., and Boegman, L. “Multi-Year Simulation of Western Lake Erie Hydrodynamics and Biogeochemistry to Evaluate Nutrient Management Scenarios”.

Table S1 Summary of Water Quality Data Sources for the Detroit River

| Parameter                         | Estimation Method                                                                                                                                               |
|-----------------------------------|-----------------------------------------------------------------------------------------------------------------------------------------------------------------|
| Flow                              | Daily data obtained from Nanette Noorbakhsh (U.S. Army Corps of Engineers) (emails)                                                                             |
| Temperature                       | Average of previous three-day air temperature                                                                                                                   |
| DO                                | $100\% \text{ Sat. O}_2 \text{ Conc.} = 14.59 - 0.3955 T + 0.0072 T^2 - 0.0000619 T^3$                                                                          |
| Si                                | Linear interpolated based on the data obtained from Environmental Monitoring and Reporting Branch_Drinking Water Surveillance Program (emails)                  |
| NH <sub>4</sub>                   | Linear interpolated based on the data obtained from U.S EPA STORET & Environmental Monitoring and Reporting Branch_Drinking Water Surveillance Program (emails) |
| NO <sub>2</sub> & NO <sub>3</sub> | Linear interpolated based on the data obtained from U.S EPA STORET & Environmental Monitoring and Reporting Branch_Drinking Water Surveillance Program (emails) |
| PO <sub>4</sub>                   | PO <sub>4</sub> = percentage of PO <sub>4</sub> (estimated based on Scavia_2014)*TP (TP loading=1080 MTA/year based on Dolan_2005)                              |
| PON                               | Linear interpolated based on the data obtained from U.S EPA STORET & Environmental Monitoring and Reporting Branch_Drinking Water Surveillance Program (emails) |
| DON                               | Linear interpolated based on the data obtained from U.S EPA STORET & Environmental Monitoring and Reporting Branch_Drinking Water Surveillance Program (emails) |
| POP                               | POP = 0.6(TP-PO <sub>4</sub> )                                                                                                                                  |
| DOP                               | DOP = 0.4(TP-PO <sub>4</sub> )                                                                                                                                  |
| POC                               | 0.2 mg L <sup>-1</sup> based on 2008 data from Dr. Leon Boegman                                                                                                 |
| DOC                               | Linear interpolated based on the data obtained from Environmental Monitoring and Reporting Branch_Drinking Water Surveillance Program (emails)                  |
| Green                             | Multiplying the ratio of chlorophyte to TP concentration (Winter_2014) by TP concentration (dividing TP loads by flow rates)                                    |
| Diatom                            | Multiplying the ratio of diatom to TP concentration (Winter_2014) by TP concentration (dividing TP loads by flow rates)                                         |
| Cyanobacteria                     | Multiplying the ratio of cyanobacteria to TP concentration (Winter_2014) by TP concentration (dividing TP loads by flow rates)                                  |
| Cryptophyte                       | Multiplying the ratio of cryptophyte to TP concentration (Winter_2014) by TP concentration (dividing TP loads by flow rates)                                    |

Table S2 Summary of Water Quality Data Sources for the Maumee River

| Parameter                         | Estimation Method                                                                                                                                                            |
|-----------------------------------|------------------------------------------------------------------------------------------------------------------------------------------------------------------------------|
| Flow                              | Downloaded from Heidelberg college                                                                                                                                           |
| Temperature                       | Average of previous three-day air temperature                                                                                                                                |
| DO                                | $100\% \text{ Sat. O}_2 \text{ Conc.} = 14.59 - 0.3955 T + 0.0072 T^2 - 0.0000619 T^3$                                                                                       |
| Si                                | $\text{SiO}_2 = 3.2 \text{ mg L}^{-1} = 114 \text{ mmol/m}^3$ based on 2008 data from Bouffard et al (2013)                                                                  |
| NH <sub>4</sub>                   | $\text{NH}_4 = 0.08 * \text{TKN}$ (0.08 is obtained based on 2008 data from Bouffard et al (2013))                                                                           |
| NO <sub>2</sub> & NO <sub>3</sub> | Downloaded from Heidelberg college                                                                                                                                           |
| PO <sub>4</sub>                   | Downloaded from Heidelberg college                                                                                                                                           |
| PON                               | $\text{PON} = 0.25 * \text{TKN}$ (0.25 is obtained based on 2008 data from Bouffard et al (2013))                                                                            |
| DON                               | $\text{PON} = 0.25 * \text{TKN}$ (0.25 is obtained based on 2008 data from Bouffard et al (2013))                                                                            |
| POP                               | POP = 0.6(TP-PO <sub>4</sub> ) [TP & PO <sub>4</sub> both downloaded from Heidelberg college ]                                                                               |
| DOP                               | DOP = 0.4(TP-PO <sub>4</sub> ) [TP & PO <sub>4</sub> both downloaded from Heidelberg college ]                                                                               |
| POC                               | POC = 0.5 mg L <sup>-1</sup> based on 2008 data from Bouffard et al (2013)                                                                                                   |
| DOC                               | DOC = 3 mg L <sup>-1</sup> based on 2008 data from Bouffard et al (2013)                                                                                                     |
| Green                             | Multiplying the ratios of chlorophyte to TP concentration (different ratio values for different months displayed in Bridgeman_2012) by TP concentration (Heidelberg college) |

|                       |                                                                                                                                                                                |
|-----------------------|--------------------------------------------------------------------------------------------------------------------------------------------------------------------------------|
| <b>Diatom</b>         | Multiplying the ratios of diatom to TP concentration (different ratio values for different months displayed in Bridgeman_2012) by TP concentration (Heidelberg college)        |
| <b>Cyano-bacteria</b> | Multiplying the ratios of cyanobacteria to TP concentration (different ratio values for different months displayed in Bridgeman_2012) by TP concentration (Heidelberg college) |
| <b>Crypto-phyte</b>   | Multiplying the ratios of cryptophyte to TP concentration (different ratio values for different months displayed in Bridgeman_2012) by TP concentration (Heidelberg college)   |

Table S3 Description, default and assigned values of the parameters in GLM

| Parameter              | Description                                                                 | Units                    | Default Value | Assigned Value | Calibration range |
|------------------------|-----------------------------------------------------------------------------|--------------------------|---------------|----------------|-------------------|
| <b>K<sub>w</sub></b>   | Extinction coefficient for PAR radiation                                    | /m                       | 0.9           | 0.76           | 0.6 – 1.0         |
| <b>C<sub>h</sub></b>   | Bulk aerodynamic coefficient for sensible heat transfer                     | –                        | 0.0013        | 0.0013         | 0.00125 - 0.00135 |
| <b>C<sub>e</sub></b>   | Bulk aerodynamic coefficient for latent heat transfer                       | –                        | 0.0013        | 0.0013         | 0.00125 - 0.00135 |
| <b>C<sub>a</sub></b>   | Bulk aerodynamic coefficient for momentum transfer                          | –                        | 0.0013        | 0.0013         | 0.00125 - 0.00135 |
| <b>C<sub>c</sub></b>   | Mixing efficiency - convective overturn                                     | –                        | 0.125         | 0.125          | -                 |
| <b>C<sub>w</sub></b>   | Mixing efficiency - wind stirring                                           | –                        | 0.23          | 0.23           | -                 |
| <b>C<sub>s</sub></b>   | Mixing efficiency - shear production                                        | –                        | 0.2           | 0.2            | -                 |
| <b>C<sub>t</sub></b>   | Mixing efficiency - unsteady turbulence (acceleration)                      | –                        | 0.51          | 0.51           | -                 |
| <b>C<sub>KH</sub></b>  | Mixing efficiency - Kelvin-Helmholtz turbulent billows                      | –                        | 0.3           | 0.3            | -                 |
| <b>C<sub>hyp</sub></b> | Mixing efficiency - hypolimnetic turbulence                                 | –                        | 0.5           | 0.5            | -                 |
| <b>wind_factor</b>     | Scaling factor that is used to multiply the wind speed data that is read in | –                        | 1.0           | 0.9            | 1.0 – 0.8         |
| <b>lw_factor</b>       | Scaling factor that is used to multiply the longwave data that is read in   | mmol/m <sup>3</sup>      | 1.0           | 0.8            | 1.0 – 0.8         |
| <b>cloud_mode</b>      | Switch to configure the atmospheric longwave emissivity sub-model           | mmol/m <sup>2</sup> /day | 4             | 1              | -                 |

Table S4 Description, default and assigned values of the parameters in AED

| Parameter             | Description                                                                   | Units                    | Default Value | Assigned Value | Calibration range |
|-----------------------|-------------------------------------------------------------------------------|--------------------------|---------------|----------------|-------------------|
| <b>theta_sed_oxy</b>  | Temperature multiplier for temperature dependence of sediment oxygen flux     | –                        | 1.08          | 1.08           | -                 |
| <b>Ksed_oxy</b>       | Half saturation constant for oxygen dependence of sediment oxygen flux        | mmol/m <sup>3</sup>      | 50            | 50             | -                 |
| <b>Fsed_oxy</b>       | Maximum flux of oxygen across the sediment water interface into the sediment  | mmol/m <sup>2</sup> /day | -20           | -20            | -                 |
| <b>theta_sed_frph</b> | Temperature multiplier for temperature dependence of sediment phosphate flux  | –                        | 1.08          | 1.1            | 1.05 – 1.1        |
| <b>Ksed_frph</b>      | Half saturation constant for oxygen dependence of sediment phosphate flux     | mmol/m <sup>3</sup>      | 50            | 50             | 40 - 60           |
| <b>Fsed_frph</b>      | Maximum flux of oxygen across the sediment water interface into the sediment  | mmol/m <sup>2</sup> /day | 0.08          | 0.2            | 0.05 – 0.25       |
| <b>theta_sed_nit</b>  | Temperature multiplier for temperature dependence of sediment nitrate flux    | –                        | 1.08          | 1.08           | -                 |
| <b>Ksed_nit</b>       | Half saturation constant for oxygen dependence of sediment nitrate flux       | mmol/m <sup>3</sup>      | 100           | 100            | -                 |
| <b>Fsed_nit</b>       | Maximum flux of nitrate across the sediment water interface into the sediment | mmol/m <sup>2</sup> /day | -0.5          | -0.5           | -                 |
| <b>Rdenit</b>         | Maximum rate of denitrification                                               | /day                     | 0.26          | 0.26           | -                 |
| <b>Kdenit</b>         | Half saturation constant for oxygen dependence of denitrification             | mmol/m <sup>3</sup>      | 2             | 2              | -                 |

|                        |                                                                                |                          |       |       |   |
|------------------------|--------------------------------------------------------------------------------|--------------------------|-------|-------|---|
| <b>theta_sed_doc</b>   | Temperature multiplier for temperature dependence of sediment DOC flux         | –                        | 1.08  | 1.08  | - |
| <b>theta_doc_miner</b> | Temperature multiplier for temperature dependence of DOC mineralization rate   | –                        | 1.08  | 1.08  | - |
| <b>Ksed_doc</b>        | Half saturation constant for oxygen dependence of sediment DOC flux            | mmol/m <sup>3</sup>      | 4.5   | 4.5   | - |
| <b>Rdoc_miner</b>      | Maximum rate of mineralization of DOC                                          | /day                     | 0.001 | 0.001 | - |
| <b>Fsed_doc</b>        | Maximum flux of DOC across the sediment water interface into the sediment      | mmol/m <sup>2</sup> /day | 10    | 10    | - |
| <b>theta_sed_amm</b>   | Temperature multiplier for temperature dependence of sediment ammonium flux    | –                        | 1.08  | 1.08  | - |
| <b>Ksed_amm</b>        | Half saturation constant for oxygen dependence of sediment ammonium flux       | mmol/m <sup>3</sup>      | 25    | 25    | - |
| <b>Fsed_amm</b>        | Maximum flux of ammonium across the sediment water interface into the sediment | mmol/m <sup>2</sup> /day | 3.5   | 3.5   | - |

Table S5 Description, default and assigned values of phytoplankton parameters in AED

| Parameter              | Description                                                 | Units | GREEN          |                 |                    | DIAT           |                 |                    | CYANO          |                 |                    | CRYPT          |                 |                    |
|------------------------|-------------------------------------------------------------|-------|----------------|-----------------|--------------------|----------------|-----------------|--------------------|----------------|-----------------|--------------------|----------------|-----------------|--------------------|
|                        |                                                             |       | De-fault Value | As-signed Value | Cali-bration range | De-fault Value | As-signed Value | Cali-bration range | De-fault Value | As-signed Value | Cali-bration range | De-fault Value | As-signed Value | Cali-bration range |
| <b>P<sub>max</sub></b> | Maximum phytoplankton growth rate of 20 °C                  | 1/d   | 1.1            | 1.394           | 1.0–2.0            | 1.1            | 2.38            | 1.0–2.5            | 1.1            | 1.8             | 1.0–2.0            | 1.1            | 1.386           | 1.0–2.0            |
| <b>v<sub>r</sub></b>   | Arrhenius temp scaling coefficient for growth               | -     | 1.05           | 1.05            | 1.0-1.2            | 1.05           | 1.04            | 1.0-1.2            | 1.05           | 1.048           | 1.0-1.2            | 1.05           | 1.05            | 1.0-1.2            |
| <b>T<sub>std</sub></b> | Standard temperature                                        | °C    | 15             | 20              | 15-22              | 15             | 7               | 5-9                | 15             | 21              | 19-22              | 15             | 18              | 15-20              |
| <b>T<sub>opt</sub></b> | Optimum temperature                                         | °C    | 24             | 24              | 22-27              | 24             | 9.8             | 9-15               | 24             | 25              | 23-30              | 24             | 21              | 21-23              |
| <b>T<sub>max</sub></b> | Maximum temperature                                         | °C    | 35             | 35              | 29-37              | 35             | 18.5            | 17-19              | 35             | 37              | 35-40              | 35             | 29              | 28-33              |
| <b>k<sub>r</sub></b>   | Phytoplankton respiration/metabolic loss rate of 20 °C      | 1/d   | 0.07           | 0.031           | 0.02-0.08          | 0.07           | 0.035           | 0.02-0.08          | 0.07           | 0.04            | 0.02-0.08          | 0.07           | 0.0285          | 0.02-0.08          |
| <b>v<sub>r</sub></b>   | Arrhenius temperature scaling for phytoplankton respiration | -     | 1.06           | 1.06            | 1.03-1.09          | 1.06           | 1.06            | 1.03-1.09          | 1.06           | 1.06            | 1.03-1.09          | 1.06           | 1.06            | 1.03-1.09          |

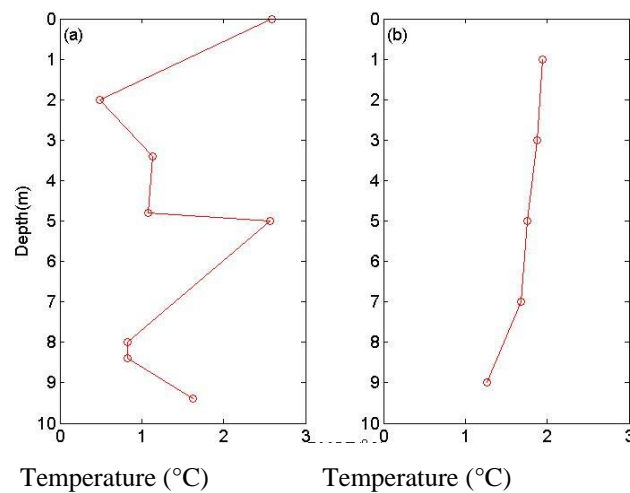

**Figure S1** Calculated RMSE temperature at Sta. W1,2 for 1994 (a) and STN357 for 2008 (b), from time series shown in Figure 3.
